# Supplementary material for: Electronic and optical properties of [Au(CH3CSS)]4 cluster. A quantum chemistry study
Source: Royal Society of Chemistry journal article supplement (doi:10.1039/d0ra06982e), 2020-01-01
Supplement: d0ra06982e1.pdf [file d0ra06982e1.pdf]

## Electronic Supplementary information:

### Electronic and Optical Properties of $[\text{Au}(\text{CH}_3\text{CSS})]_4$ Cluster. A Quantum Chemistry Study

Fernando Mendizabal<sup>\*a</sup> and Sebastián Miranda-Rojas<sup>\*b</sup>

<sup>a</sup>Departamento de Química, Facultad de Ciencias, Universidad de Chile, P.O. Box 653, Las Palmeras 3425, Ñuñoa, Santiago, Chile. E-mail: hagua@uchile.cl

<sup>b</sup>Departamento de Ciencias Químicas, Facultad de Ciencias Exactas, Universidad Andres Bello, Avenida República 275, Santiago, Chile.

#### Tables.

**Table S1.** Cartesian coordinates (in Angstroms) for the optimized geometries of the systems studied in this work. Ground State ( $S_0$ ).

#### MP2 (gas)

|    |            |            |            |
|----|------------|------------|------------|
| Au | -0.0649404 | -2.1458380 | -1.0284203 |
| Au | -0.0374936 | 0.6167545  | -1.3114784 |
| Au | 0.0087404  | -0.5839635 | 1.2676846  |
| Au | 0.0254375  | 2.1787233  | 0.9850744  |
| S  | 2.0646294  | -2.2658367 | -1.8882250 |
| S  | 2.2351337  | 0.7854444  | -1.6030317 |
| S  | -2.3171011 | 0.7060878  | -1.5764043 |
| S  | -2.2115767 | -2.8013993 | -0.5265828 |
| S  | -2.2591370 | -0.6172148 | 1.6297199  |
| S  | 2.2868678  | -0.8032677 | 1.4633426  |
| S  | 2.1921294  | 2.2510852  | 1.7534390  |
| S  | -2.1241196 | 2.8873174  | 0.5745052  |
| C  | -2.9323452 | -1.8481102 | 0.6769909  |
| C  | -4.3774634 | -2.1545095 | 0.9548230  |
| C  | 2.8493862  | -0.7628845 | -1.9215832 |
| C  | 4.3235584  | -0.8188432 | -2.2076830 |
| C  | 2.9461149  | 0.7318454  | 1.7532816  |
| C  | 4.4318639  | 0.7589128  | 1.9765365  |
| C  | -2.9188114 | 1.9528050  | -0.5969583 |
| C  | -4.3679312 | 2.2916996  | -0.8090937 |
| H  | -4.4518453 | -3.0328333 | 1.6049950  |
| H  | -4.8685558 | -1.3192481 | 1.4594568  |
| H  | -4.9145132 | -2.3747288 | 0.0290590  |
| H  | 4.5627509  | -1.6548506 | -2.8693471 |
| H  | 4.6756159  | 0.1065805  | -2.6691942 |
| H  | 4.8701123  | -0.9668560 | -1.2694473 |
| H  | 4.9376235  | 0.9689390  | 1.0274889  |
| H  | 4.7061099  | 1.5474193  | 2.6817966  |
| H  | 4.7965644  | -0.1968994 | 2.3594098  |
| H  | -4.4517102 | 3.2116057  | -1.3975278 |
| H  | -4.8852654 | 1.4963509  | -1.3502657 |
| H  | -4.8729142 | 2.4572206  | 0.1460021  |

### SCS-MP2 (gas)

|    |            |            |            |
|----|------------|------------|------------|
| Au | -0.0702402 | -2.2257229 | -1.0680397 |
| Au | -0.0348469 | 0.6455001  | -1.3710559 |
| Au | 0.0108390  | -0.6088745 | 1.3246979  |
| Au | 0.0257170  | 2.2624845  | 1.0227016  |
| S  | 2.1166041  | -2.3404387 | -1.8187255 |
| S  | 2.2526200  | 0.7119646  | -1.7130534 |
| S  | -2.3296746 | 0.8353536  | -1.5941408 |
| S  | -2.2728298 | -2.7865584 | -0.6296774 |
| S  | -2.2760836 | -0.7458193 | 1.6470806  |
| S  | 2.3088700  | -0.7270087 | 1.5665450  |
| S  | 2.2442106  | 2.3273568  | 1.6809000  |
| S  | -2.1800087 | 2.8747047  | 0.6788156  |
| C  | -2.9523313 | -1.9044497 | 0.6326140  |
| C  | -4.4021412 | -2.2183165 | 0.9114311  |
| C  | 2.8654168  | -0.8375366 | -1.9394272 |
| C  | 4.3444560  | -0.8967930 | -2.2340982 |
| C  | 2.9645605  | 0.8081442  | 1.7681587  |
| C  | 4.4551850  | 0.8356760  | 2.0031229  |
| C  | -2.9343686 | 2.0082122  | -0.5518307 |
| C  | -4.3884435 | 2.3535211  | -0.7633599 |
| H  | -4.4636386 | -3.0897710 | 1.5731590  |
| H  | -4.8987419 | -1.3813300 | 1.4076917  |
| H  | -4.9373665 | -2.4567689 | -0.0108152 |
| H  | 4.5767740  | -1.7317680 | -2.8997667 |
| H  | 4.6974614  | 0.0298089  | -2.6921586 |
| H  | 4.8918659  | -1.0522327 | -1.2971856 |
| H  | 4.9661689  | 1.0370123  | 1.0546766  |
| H  | 4.7237483  | 1.6318587  | 2.7023851  |
| H  | 4.8155118  | -0.1169803 | 2.3972980  |
| H  | -4.4608788 | 3.2647376  | -1.3678096 |
| H  | -4.9126336 | 1.5537311  | -1.2914575 |

### PBE(gas)

|    |            |            |            |
|----|------------|------------|------------|
| Au | -0.0874916 | -2.2769043 | -1.1201182 |
| Au | -0.0371742 | 0.7082141  | -1.5033558 |
| Au | 0.0153418  | -0.6600871 | 1.4217854  |
| Au | 0.0322896  | 2.3242983  | 1.0403869  |
| S  | 2.1338659  | -2.3897913 | -1.8252222 |
| S  | 2.2776503  | 0.6907327  | -1.8081872 |
| S  | -2.3562867 | 0.9258307  | -1.6414332 |
| S  | -2.3182042 | -2.8072250 | -0.6886848 |
| S  | -2.2999559 | -0.8236669 | 1.6723615  |
| S  | 2.3402982  | -0.7021312 | 1.6342643  |
| S  | 2.2800150  | 2.3805075  | 1.6645374  |
| S  | -2.2037231 | 2.9080463  | 0.7155838  |
| C  | -2.9939756 | -1.9432946 | 0.6049369  |
| C  | -4.4430926 | -2.2280446 | 0.8608222  |
| C  | 2.9003358  | -0.8807883 | -1.9368685 |
| C  | 4.3846474  | -0.9481526 | -2.1306310 |
| C  | 3.0089283  | 0.8509805  | 1.7520510  |
| C  | 4.4983521  | 0.8795367  | 1.9165480  |
| C  | -2.9686980 | 2.0539823  | -0.5349310 |
| C  | -4.4277521 | 2.3564906  | -0.6985256 |
| H  | -4.5396429 | -3.1174292 | 1.5063412  |
| H  | -4.9376628 | -1.3951590 | 1.3797155  |
| H  | -4.9885805 | -2.4400284 | -0.0695135 |

|   |            |            |            |
|---|------------|------------|------------|
| H | 4.6825923  | -1.8377228 | -2.7036587 |
| H | 4.7775810  | -0.0543763 | -2.6347711 |
| H | 4.8767650  | -1.0188901 | -1.1453809 |
| H | 4.9731093  | 1.0854173  | 0.9419864  |
| H | 4.8142723  | 1.6808126  | 2.6005776  |
| H | 4.8933124  | -0.0754806 | 2.2885890  |
| H | -4.5553131 | 3.3207402  | -1.2187301 |
| H | -4.9409587 | 1.5907336  | -1.2958185 |
| H | -4.9339294 | 2.4443566  | 0.2737062  |

### TPSS (gas)

|    |            |            |            |
|----|------------|------------|------------|
| Au | -0.0741369 | -2.2594819 | -1.0902099 |
| Au | -0.0336424 | 0.6812206  | -1.4437733 |
| Au | 0.0200173  | -0.6500446 | 1.3962396  |
| Au | 0.0234754  | 2.2904466  | 1.0441132  |
| S  | 2.1581729  | -2.3812252 | -1.7817488 |
| S  | 2.2881875  | 0.6965248  | -1.7464280 |
| S  | -2.3603656 | 0.8744367  | -1.6069397 |
| S  | -2.3188134 | -2.7819674 | -0.6874361 |
| S  | -2.3031345 | -0.7792544 | 1.6534403  |
| S  | 2.3511158  | -0.7170158 | 1.6013532  |
| S  | 2.2833176  | 2.3628540  | 1.6468668  |
| S  | -2.2226042 | 2.8713838  | 0.7342809  |
| C  | -3.0050771 | -1.8940140 | 0.5854728  |
| C  | -4.4692788 | -2.1463964 | 0.8168536  |
| C  | 2.9227580  | -0.8695916 | -1.8857130 |
| C  | 4.4119788  | -0.9312233 | -2.0817888 |
| C  | 3.0217072  | 0.8361113  | 1.7149833  |
| C  | 4.5187471  | 0.8677922  | 1.8488666  |
| C  | -2.9869684 | 2.0024626  | -0.5075777 |
| C  | -4.4553700 | 2.2862191  | -0.6674067 |
| H  | -4.5931384 | -3.0214644 | 1.4704528  |
| H  | -4.9498053 | -1.2950780 | 1.3099560  |
| H  | -4.9930743 | -2.3572950 | -0.1213671 |
| H  | 4.7011838  | -1.7945600 | -2.6908170 |
| H  | 4.7997098  | -0.0202859 | -2.5486858 |
| H  | 4.8984077  | -1.0434825 | -1.1022776 |
| H  | 4.9646788  | 1.0464828  | 0.8599825  |
| H  | 4.8444411  | 1.6829706  | 2.5045321  |
| H  | 4.9139949  | -0.0773970 | 2.2338514  |
| H  | -4.5931046 | 3.2421796  | -1.1918233 |
| H  | -4.9547383 | 1.5091985  | -1.2544885 |
| H  | -4.9517265 | 2.3710022  | 0.3055993  |

### MP2 (CS<sub>2</sub>)

|    |            |            |            |
|----|------------|------------|------------|
| Au | -0.0681708 | -2.1766471 | -1.0494302 |
| Au | -0.0319646 | 0.6326935  | -1.3322083 |
| Au | 0.0097778  | -0.5935222 | 1.2883119  |
| Au | 0.0259292  | 2.2160545  | 1.0063499  |
| S  | 2.0933032  | -2.2981294 | -1.8144235 |
| S  | 2.2366438  | 0.7406715  | -1.6505657 |
| S  | -2.3084706 | 0.7750982  | -1.5691777 |
| S  | -2.2458408 | -2.7564657 | -0.6107986 |
| S  | -2.2567702 | -0.6867792 | 1.6246608  |
| S  | 2.2870226  | -0.7527570 | 1.5081392  |

|   |            |            |            |
|---|------------|------------|------------|
| S | 2.2200661  | 2.2882144  | 1.6789458  |
| S | -2.1549686 | 2.8448759  | 0.6608581  |
| C | -2.9379773 | -1.8548263 | 0.6283626  |
| C | -4.3875449 | -2.1472653 | 0.8951732  |
| C | 2.8543665  | -0.8006189 | -1.8998039 |
| C | 4.3306264  | -0.8582279 | -2.1726467 |
| C | 2.9497800  | 0.7736848  | 1.7315679  |
| C | 4.4372152  | 0.7974941  | 1.9414948  |
| C | -2.9201548 | 1.9576981  | -0.5454480 |
| C | -4.3734348 | 2.2812065  | -0.7485775 |
| H | -4.4676071 | -2.9810393 | 1.6006347  |
| H | -4.8886067 | -1.2844618 | 1.3385939  |
| H | -4.9087953 | -2.4297773 | -0.0213346 |
| H | 4.5714886  | -1.6806773 | -2.8495501 |
| H | 4.6952632  | 0.0744997  | -2.6063273 |
| H | 4.8638750  | -1.0340346 | -1.2321140 |
| H | 4.9336616  | 0.9663307  | 0.9797863  |
| H | 4.7246786  | 1.6111501  | 2.6108428  |
| H | 4.7993878  | -0.1450551 | 2.3555282  |
| H | -4.4655381 | 3.1293262  | -1.4352251 |
| H | -4.9083639 | 1.4361373  | -1.1863970 |
| H | -4.8519620 | 2.5566571  | 0.1931412  |

### SCS-MP2 (CS<sub>2</sub>)

|    |            |            |            |
|----|------------|------------|------------|
| Au | -0.0692950 | -2.2240273 | -1.0685496 |
| Au | -0.0325040 | 0.6487497  | -1.3696384 |
| Au | 0.0105751  | -0.6100354 | 1.3267371  |
| Au | 0.0259987  | 2.2629285  | 1.0259828  |
| S  | 2.1201965  | -2.3396644 | -1.8100274 |
| S  | 2.2548147  | 0.7110255  | -1.7098616 |
| S  | -2.3273059 | 0.8394043  | -1.5891824 |
| S  | -2.2749852 | -2.7787259 | -0.6396909 |
| S  | -2.2765504 | -0.7493524 | 1.6440440  |
| S  | 2.3084370  | -0.7239199 | 1.5680523  |
| S  | 2.2474346  | 2.3289714  | 1.6723310  |
| S  | -2.1834230 | 2.8659876  | 0.6925423  |
| C  | -2.9583834 | -1.8986313 | 0.6227062  |
| C  | -4.4110162 | -2.2005817 | 0.8926507  |
| C  | 2.8727746  | -0.8372250 | -1.9276045 |
| C  | 4.3524379  | -0.8972012 | -2.2110649 |
| C  | 2.9701438  | 0.8098049  | 1.7582804  |
| C  | 4.4615133  | 0.8359935  | 1.9785575  |
| C  | -2.9394518 | 2.0019428  | -0.5393256 |
| C  | -4.3956743 | 2.3353745  | -0.7453533 |
| H  | -4.4814212 | -3.0406174 | 1.5931011  |
| H  | -4.9146179 | -1.3426127 | 1.3445517  |
| H  | -4.9343847 | -2.4792441 | -0.0248544 |
| H  | 4.5873039  | -1.7234893 | -2.8868346 |
| H  | 4.7143979  | 0.0343933  | -2.6513774 |
| H  | 4.8906101  | -1.0691717 | -1.2716825 |
| H  | 4.9631215  | 1.0010978  | 1.0179458  |
| H  | 4.7428037  | 1.6535433  | 2.6472223  |
| H  | 4.8212533  | -0.1054584 | 2.3992891  |
| H  | -4.4780132 | 3.1916907  | -1.4244410 |
| H  | -4.9331569 | 1.4966768  | -1.1941993 |
| H  | -4.8767187 | 2.6038813  | 0.1980563  |

**PBE(CS<sub>2</sub>)**

|    |            |            |            |
|----|------------|------------|------------|
| Au | -0.0865486 | -2.2765098 | -1.1178573 |
| Au | -0.0371616 | 0.7080856  | -1.5028229 |
| Au | 0.0154595  | -0.6609238 | 1.4232097  |
| Au | 0.0316603  | 2.3232742  | 1.0400428  |
| S  | 2.1354158  | -2.3876207 | -1.8245755 |
| S  | 2.2779514  | 0.6895164  | -1.8095743 |
| S  | -2.3571907 | 0.9262449  | -1.6390859 |
| S  | -2.3182627 | -2.8064278 | -0.6865656 |
| S  | -2.3006234 | -0.8248192 | 1.6713066  |
| S  | 2.3407195  | -0.7010308 | 1.6362866  |
| S  | 2.2797436  | 2.3781474  | 1.6659860  |
| S  | -2.2046734 | 2.9078599  | 0.7134654  |
| C  | -3.0021958 | -1.9441052 | 0.6071591  |
| C  | -4.4482612 | -2.2255829 | 0.8595833  |
| C  | 2.9094917  | -0.8793996 | -1.9366328 |
| C  | 4.3895081  | -0.9469015 | -2.1322658 |
| C  | 3.0171164  | 0.8496131  | 1.7526872  |
| C  | 4.5024476  | 0.8780381  | 1.9169079  |
| C  | -2.9777325 | 2.0548237  | -0.5363326 |
| C  | -4.4332867 | 2.3546701  | -0.6980052 |
| H  | -4.5445682 | -3.1153708 | 1.5059338  |
| H  | -4.9455077 | -1.3945681 | 1.3792924  |
| H  | -4.9955428 | -2.4401987 | -0.0693968 |
| H  | 4.6891381  | -1.8362385 | -2.7053730 |
| H  | 4.7858261  | -0.0531596 | -2.6339562 |
| H  | 4.8846302  | -1.0191727 | -1.1478053 |
| H  | 4.9785033  | 1.0813843  | 0.9416413  |
| H  | 4.8215904  | 1.6815350  | 2.5974641  |
| H  | 4.9003636  | -0.0756933 | 2.2892452  |
| H  | -4.5599834 | 3.3188670  | -1.2202263 |
| H  | -4.9497489 | 1.5903472  | -1.2945751 |
| H  | -4.9413629 | 2.4468241  | 0.2732021  |

**TPSS (CS<sub>2</sub>)**

|    |            |            |            |
|----|------------|------------|------------|
| Au | -0.0712603 | -2.2546467 | -1.0856766 |
| Au | -0.0364049 | 0.6831941  | -1.4488346 |
| Au | 0.0154398  | -0.6488874 | 1.4000846  |
| Au | 0.0287103  | 2.2886627  | 1.0373889  |
| S  | 2.1613325  | -2.3704810 | -1.7827634 |
| S  | 2.2848050  | 0.7042564  | -1.7496904 |
| S  | -2.3643290 | 0.8662422  | -1.6021587 |
| S  | -2.3152445 | -2.7833360 | -0.6779203 |
| S  | -2.3082673 | -0.7759574 | 1.6536335  |
| S  | 2.3465894  | -0.7210923 | 1.6027392  |
| S  | 2.2892508  | 2.3551883  | 1.6444922  |
| S  | -2.2178654 | 2.8720018  | 0.7261520  |
| C  | -3.0142402 | -1.8926204 | 0.5895907  |
| C  | -4.4765027 | -2.1407762 | 0.8134732  |
| C  | 2.9306666  | -0.8580988 | -1.8859122 |
| C  | 4.4166877  | -0.9141582 | -2.0792223 |
| C  | 3.0305909  | 0.8269204  | 1.7140115  |
| C  | 4.5241316  | 0.8523007  | 1.8477921  |
| C  | -2.9947785 | 1.9980388  | -0.5078099 |
| C  | -4.4601379 | 2.2785814  | -0.6632496 |
| H  | -4.6025172 | -3.0144061 | 1.4694654  |

|   |            |            |            |
|---|------------|------------|------------|
| H | -4.9604765 | -1.2896045 | 1.3035612  |
| H | -4.9984269 | -2.3551119 | -0.1250556 |
| H | 4.7111820  | -1.7688139 | -2.6981461 |
| H | 4.8062359  | 0.0037370  | -2.5305206 |
| H | 4.9016994  | -1.0391191 | -1.0999970 |
| H | 4.9722939  | 0.9996568  | 0.8541671  |
| H | 4.8578356  | 1.6834521  | 2.4789543  |
| H | 4.9155086  | -0.0844908 | 2.2564432  |
| H | -4.5967753 | 3.1982925  | -1.2503147 |
| H | -4.9734870 | 1.4697916  | -1.1929366 |
| H | -4.9453313 | 2.4327919  | 0.3066226  |

Wavelengths ( $\lambda$ ) and oscillator strengths ( $f$ ) for the UV/Vis spectra of the  $\text{Au}(\text{S}_2\text{CCH}_3)_4$  CC2, SCS-CC2, ADC(2) and TDDFT (PBE and TPSS). All spectra were calculated in the gas phase and with the COSMO solvation model (epsilon = 2.6, CS<sub>2</sub>). Wavelengths ( $\lambda$ ) are given in nm.

**Table S2. Gas phase**

| CC2                 |                     | SCS-CC2             |                     | ADC(2)              |                     |
|---------------------|---------------------|---------------------|---------------------|---------------------|---------------------|
| $\lambda/\text{nm}$ | $F$                 | $\lambda/\text{nm}$ | $f$                 | $\lambda/\text{nm}$ | $F$                 |
| 579                 | 0.45E <sup>-5</sup> | 580                 | 0.38E <sup>-5</sup> | 618                 | 0.70E <sup>-6</sup> |
| 546                 | 0.00076             | 58                  | 0.00093             | 576                 | 0.00015             |
| 522                 | 0.00027             | 525                 | 0.00004             | 551                 | 0.00014             |
| 468                 | 0.03061             | 470                 | 0.04212             | 494                 | 0.00347             |
| 446                 | 0.03988             | 449                 | 0.02841             | 471                 | 0.02197             |
| 431                 | 0.00077             | 433                 | 0.00045             | 444                 | 0.00049             |
| 424                 | 0.00005             | 421                 | 0.00003             | 443                 | 0.01623             |
| 414                 | 0.08239             | 415                 | 0.08022             | 442                 | 0.00017             |
| 410                 | 0.00022             | 411                 | 0.00433             | 429                 | 0.08373             |
| 400                 | 0.05934             | 404                 | 0.05211             | 419                 | 0.05369             |
| 380                 | 0.45E <sup>-5</sup> | 399                 | 0.00001             | 409                 | 0.00003             |

| PBE          |         | TPSS         |                       |
|--------------|---------|--------------|-----------------------|
| $\lambda/nm$ | $f$     | $\lambda/nm$ | $f$                   |
| 650          | 0.00002 | 646          | 0.461E <sup>-5</sup>  |
| 632          | 0.00048 | 623          | 0.000497              |
| 604          | 0.00131 | 597          | 0.001145              |
| 526          | 0.00001 | 525          | 0.987 E <sup>-5</sup> |
| 509          | 0.00898 | 504          | 0.012916              |
| 504          | 0.00435 | 499          | 0.006059              |
| 492          | 0.01253 | 483          | 0.000011              |
| 489          | 0.00008 | 478          | 0.011299              |
| 484          | 0.00461 | 467          | 0.000715              |
| 481          | 0.00125 | 466          | 0.003433              |
| 479          | 0.00043 | 464          | 0.000818              |
| 467          | 0.02046 | 454          | 0.001695              |
| 455          | 0.00029 | 445          | 0.001568              |
| 454          | 0.00118 | 441          | 0.000586              |
| 451          | 0.00207 | 440          | 0.000813              |
| 443          | 0.00117 | 436          | 0.002595              |
| 437          | 0.01775 | 432          | 0.014449              |
| 436          | 0.02242 | 424          | 0.018933              |
| 435          | 0.01222 | 424          | 0.018378              |
| 427          | 0.00170 | 417          | 0.002393              |
| 417          | 0.00170 | 408          | 0.002552              |
| 415          | 0.00002 | 405          | 0.000011              |
| 413          | 0.00016 | 403          | 0.000475              |
| 400          | 0.00167 | 387          | 0.001584              |
| 394          | 0.00012 | 384          | 0.287E <sup>-5</sup>  |

**Table S3. CS<sub>2</sub> phase**

| CC2          |                     | SCS-CC2      |                     | ADC(2)       |                     |
|--------------|---------------------|--------------|---------------------|--------------|---------------------|
| $\lambda/nm$ | $f$                 | $\lambda/nm$ | $f$                 | $\lambda/nm$ | $f$                 |
| 568          | 0.45E <sup>-5</sup> | 576          | 0.40E <sup>-5</sup> | 618          | 0.40E <sup>-5</sup> |
| 537          | 0.000760            | 544          | 0.00083             | 575          | 0.00015             |
| 503          | 0.000274            | 513          | 0.00005             | 551          | 0.00019             |
| 453          | 0.000361            | 464          | 0.03612             | 494          | 0.00509             |
| 441          | 0.039884            | 446          | 0.03955             | 472          | 0.02924             |
| 419          | 0.000772            | 430          | 0.00055             | 445          | 0.00016             |
| 411          | 0.000051            | 420          | 0.00014             | 444          | 0.02525             |
| 410          | 0.082390            | 409          | 0.08291             | 443          | 0.00018             |
| 408          | 0.000219            | 405          | 0.00450             | 431          | 0.11637             |
| 400          | 0.059335            | 403          | 0.04833             | 422          | 0.06600             |
| 380          | 0.20E <sup>-5</sup> | 395          | 0.00002             | 411          | 0.00003             |

| PBE          |         | TPSS         |          |
|--------------|---------|--------------|----------|
| $\lambda/nm$ | $f$     | $\lambda/nm$ | $f$      |
| 634          | 0.00003 | 633          | 0.000010 |
| 616          | 0.00059 | 610          | 0.000581 |
| 589          | 0.00182 | 585          | 0.001579 |
| 515          | 0.00002 | 516          | 0.000019 |
| 500          | 0.01394 | 497          | 0.019034 |
| 495          | 0.00445 | 490          | 0.008037 |
| 485          | 0.01987 | 474          | 0.000037 |
| 479          | 0.00032 | 472          | 0.017513 |
| 477          | 0.00714 | 463          | 0.000935 |
| 474          | 0.00197 | 460          | 0.005654 |
| 473          | 0.00022 | 458          | 0.000727 |
| 462          | 0.02805 | 449          | 0.024583 |
| 449          | 0.00019 | 439          | 0.022841 |
| 447          | 0.00173 | 435          | 0.000047 |
| 445          | 0.04483 | 435          | 0.002744 |
| 438          | 0.01471 | 431          | 0.000379 |
| 432          | 0.02460 | 426          | 0.019369 |
| 430          | 0.02955 | 420          | 0.025336 |
| 427          | 0.01435 | 419          | 0.026465 |
| 421          | 0.00276 | 411          | 0.003888 |
| 412          | 0.02277 | 403          | 0.002953 |
| 409          | 0.00004 | 400          | 0.000014 |
| 408          | 0.00031 | 398          | 0.000919 |
| 398          | 0.00232 | 386          | 0.002155 |
| 391          | 0.00017 | 379          | 0.000001 |



**Table S4.** Cartesian coordinates (in Angstroms) for the optimized geometries of the systems studied in this work at first triplet excited state ( $T_1$ ) in the ethanol phase.

**MP2**

|    |           |           |           |
|----|-----------|-----------|-----------|
| Au | -0.168190 | -2.289460 | 0.003963  |
| Au | 0.023368  | -0.018209 | 1.463335  |
| Au | -0.027089 | -0.013625 | -1.454017 |
| Au | 0.175928  | 2.272730  | -0.019998 |
| S  | -2.332573 | -2.578332 | 0.722489  |
| S  | -2.221416 | 0.290084  | 1.850869  |
| S  | 2.292210  | -0.251944 | 1.749702  |
| S  | 1.926812  | -2.867641 | -0.745007 |
| S  | 2.243956  | -0.015171 | -1.809875 |
| S  | -2.302835 | 0.067577  | -1.768129 |
| S  | -1.942513 | 2.880441  | -0.673587 |
| S  | 2.340115  | 2.583346  | 0.689997  |
| C  | 2.840720  | -1.546609 | -1.430061 |
| C  | 4.263675  | -1.839586 | -1.791110 |
| C  | -3.025085 | -1.216408 | 1.437527  |
| C  | -4.502119 | -1.242380 | 1.679783  |
| C  | -2.828701 | 1.637380  | -1.444291 |
| C  | -4.281154 | 1.933378  | -1.653472 |
| C  | 3.023481  | 1.236265  | 1.439590  |
| C  | 4.477135  | 1.303699  | 1.790780  |
| H  | 4.315495  | -2.402700 | -2.730368 |
| H  | 4.827131  | -0.908846 | -1.926125 |
| H  | 4.742368  | -2.445763 | -1.013041 |
| H  | -4.840742 | -2.263524 | 1.890939  |
| H  | -4.767022 | -0.589643 | 2.519872  |
| H  | -5.044889 | -0.894438 | 0.793033  |
| H  | -4.837639 | 1.817390  | -0.715997 |
| H  | -4.419925 | 2.968186  | -1.987991 |
| H  | -4.711309 | 1.250425  | -2.395449 |
| H  | 4.622064  | 1.847075  | 2.731910  |
| H  | 4.891164  | 0.296260  | 1.915822  |
| H  | 5.038129  | 1.833940  | 1.012243  |

**SCS-MP2**

|    |           |           |           |
|----|-----------|-----------|-----------|
| Au | -0.058887 | -2.326663 | -0.017163 |
| Au | 0.020064  | -0.030839 | 1.456178  |
| Au | -0.023543 | 0.005701  | -1.433710 |
| Au | 0.066075  | 2.333505  | -0.012065 |
| S  | -2.211945 | -2.718646 | 0.700092  |
| S  | -2.250393 | 0.121082  | 1.810737  |
| S  | 2.301080  | -0.149710 | 1.750465  |
| S  | 2.069857  | -2.791489 | -0.762918 |
| S  | 2.253920  | 0.063114  | -1.770806 |
| S  | -2.306021 | 0.000154  | -1.740354 |
| S  | -2.082492 | 2.828214  | -0.677413 |
| S  | 2.243695  | 2.675519  | 0.654841  |
| C  | 2.902809  | -1.456760 | -1.421343 |
| C  | 4.343951  | -1.683421 | -1.786948 |
| C  | -2.962731 | -1.382052 | 1.409345  |
| C  | -4.444226 | -1.479746 | 1.649265  |

|   |           |           |           |
|---|-----------|-----------|-----------|
| C | -2.915496 | 1.534240  | -1.382137 |
| C | -4.389616 | 1.747983  | -1.590022 |
| C | 2.977328  | 1.368084  | 1.446837  |
| C | 4.431810  | 1.482085  | 1.812101  |
| H | 4.433663  | -2.222073 | -2.740795 |
| H | 4.881163  | -0.731366 | -1.901024 |
| H | 4.857863  | -2.288982 | -1.027205 |
| H | -4.746065 | -2.514233 | 1.865480  |
| H | -4.755902 | -0.839655 | 2.486618  |
| H | -5.013532 | -1.163753 | 0.763794  |
| H | -4.951909 | 1.581812  | -0.660381 |
| H | -4.602789 | 2.779226  | -1.904847 |
| H | -4.789756 | 1.059325  | -2.347424 |
| H | 4.564288  | 2.026699  | 2.757545  |
| H | 4.889791  | 0.491250  | 1.940618  |
| H | 4.993927  | 2.032825  | 1.044814  |

### PBE

|    |            |            |            |
|----|------------|------------|------------|
| Au | -0.1681680 | -1.9450166 | -1.2064992 |
| Au | 0.1073954  | 0.8662539  | -1.5772256 |
| Au | 0.1472297  | -0.8278679 | 1.5419541  |
| Au | -0.0784617 | 1.9889727  | 1.1811011  |
| S  | 2.0914030  | -2.3573422 | -1.6386149 |
| S  | 2.4375361  | 0.7010136  | -1.8336383 |
| S  | -2.1684621 | 1.2434116  | -1.8636972 |
| S  | -2.4791897 | -1.9607004 | -1.0555250 |
| S  | -2.1233961 | -1.1545889 | 1.9200702  |
| S  | 2.4899381  | -0.7175618 | 1.6898810  |
| S  | 2.2068197  | 2.3485104  | 1.5141523  |
| S  | -2.3926901 | 2.0544149  | 1.1224852  |
| C  | -3.0341541 | -1.5100035 | 0.5077783  |
| C  | -4.5152447 | -1.5616578 | 0.7053726  |
| C  | 2.9631010  | -0.9100465 | -1.8225007 |
| C  | 4.4443324  | -1.0898316 | -1.9483362 |
| C  | 3.0523353  | 0.8804985  | 1.6526315  |
| C  | 4.5417548  | 1.0251519  | 1.7044739  |
| C  | -3.0167366 | 1.6160110  | -0.4178125 |
| C  | -4.5029543 | 1.6970591  | -0.5581020 |
| H  | -4.8344771 | -2.5482646 | 1.0869057  |
| H  | -4.8530832 | -0.8098284 | 1.4347535  |
| H  | -5.0585054 | -1.3921224 | -0.2359899 |
| H  | 4.6976425  | -1.9999830 | -2.5112891 |
| H  | 4.9269216  | -0.2295332 | -2.4321393 |
| H  | 4.8848150  | -1.2007693 | -0.9425276 |
| H  | 4.9282366  | 1.1868543  | 0.6835021  |
| H  | 4.8443748  | 1.8979148  | 2.3015916  |
| H  | 5.0321184  | 0.1309577  | 2.1128830  |
| H  | -4.8180200 | 2.6915308  | -0.9218054 |
| H  | -4.8825714 | 0.9561083  | -1.2778361 |
| H  | -5.0129249 | 1.5319626  | 0.4023660  |

### TPSS

|    |            |            |            |
|----|------------|------------|------------|
| Au | 0.0788403  | -2.2498667 | -0.6373154 |
| Au | -0.1739943 | 0.5015820  | -1.5547727 |
| Au | -0.1205913 | -0.4584735 | 1.5144806  |

|    |            |            |            |
|----|------------|------------|------------|
| Au | 0.1578556  | 2.2867665  | 0.5867532  |
| S  | 2.4021911  | -2.2212745 | -0.6513556 |
| S  | 2.0765657  | 0.4453064  | -2.1795136 |
| S  | -2.5087204 | 0.8310990  | -1.5794924 |
| S  | -2.2177199 | -2.6991766 | -0.7200218 |
| S  | -2.4585108 | -0.7375012 | 1.6421254  |
| S  | 2.1556253  | -0.4536276 | 2.0418873  |
| S  | 2.4779843  | 2.2049657  | 0.5008585  |
| S  | -2.1223488 | 2.7860406  | 0.7689971  |
| C  | -3.0431481 | -1.8309727 | 0.4906995  |
| C  | -4.5191041 | -2.0784608 | 0.5451670  |
| C  | 2.9890609  | -0.8067460 | -1.4362448 |
| C  | 4.4691960  | -0.7488261 | -1.6514357 |
| C  | 3.0648588  | 0.7775814  | 1.2614737  |
| C  | 4.5507334  | 0.6860301  | 1.4162564  |
| C  | -3.0184359 | 1.9360104  | -0.4037141 |
| C  | -4.4898371 | 2.2144249  | -0.3927943 |
| H  | -4.7139029 | -3.0308727 | 1.0585495  |
| H  | -5.0414355 | -1.2893576 | 1.0937731  |
| H  | -4.9456442 | -2.1578891 | -0.4608467 |
| H  | 4.7429818  | -1.2158446 | -2.6098344 |
| H  | 4.8303092  | 0.2855326  | -1.6777128 |
| H  | 5.0095778  | -1.2859607 | -0.8643983 |
| H  | 5.0706648  | 1.2159302  | 0.6109192  |
| H  | 4.8729707  | 1.1410604  | 2.3652377  |
| H  | 4.8895768  | -0.3560560 | 1.4227791  |
| H  | -4.6866942 | 3.1750462  | -0.8898478 |
| H  | -5.0517176 | 1.4405849  | -0.9238672 |
| H  | -4.8702723 | 2.2944528  | 0.6315733  |

## Figures.

F1. Calculated ADC(2) electronic spectra of  $[\text{Au}(\text{S}_2\text{CCH}_3)_4]$  in the  $\text{CS}_2$  phase.

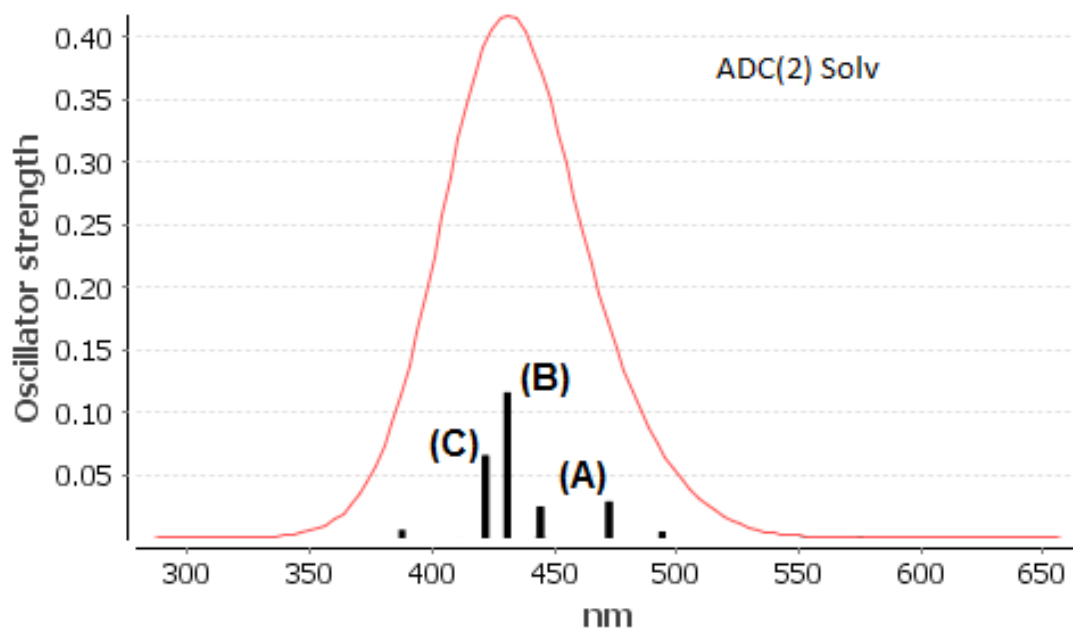

F2. Calculated PBE electronic spectra of  $[\text{Au}(\text{S}_2\text{CCH}_3)_4]$  in the  $\text{CS}_2$  phase.

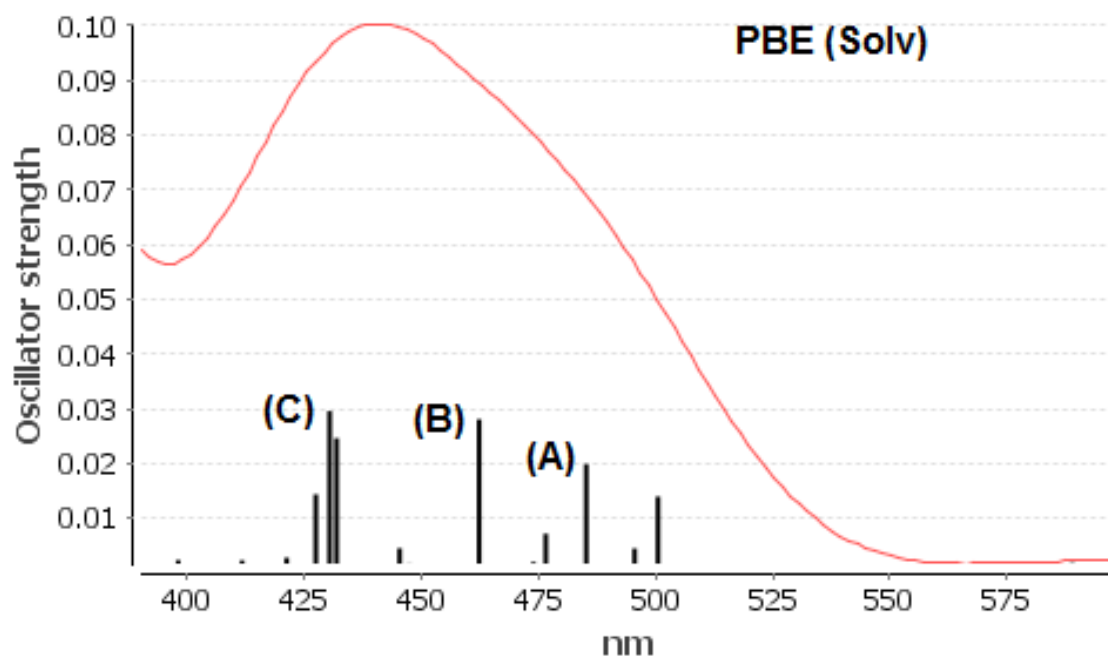

**F3.** Calculated TPSS electronic spectra of  $[\text{Au}(\text{S}_2\text{CCH}_3)_4]$  in the  $\text{CS}_2$  phase.

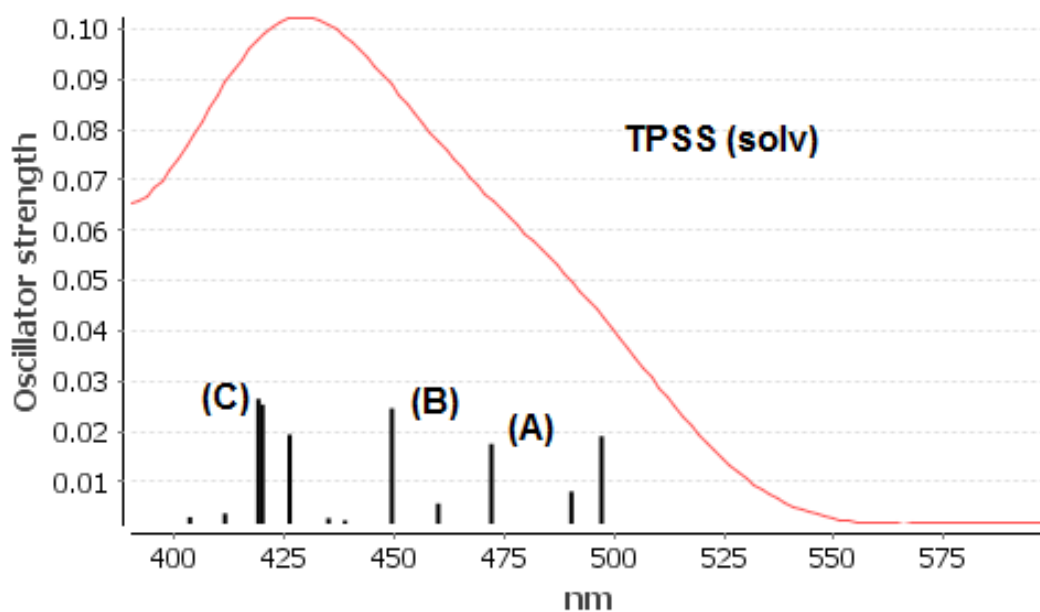

**F4.** Most important active molecular orbitals in the electronic transitions of  $[\text{Au}(\text{S}_2\text{CCH}_3)_4]$  in the  $\text{CS}_2$  phase at the ADC(2) level.

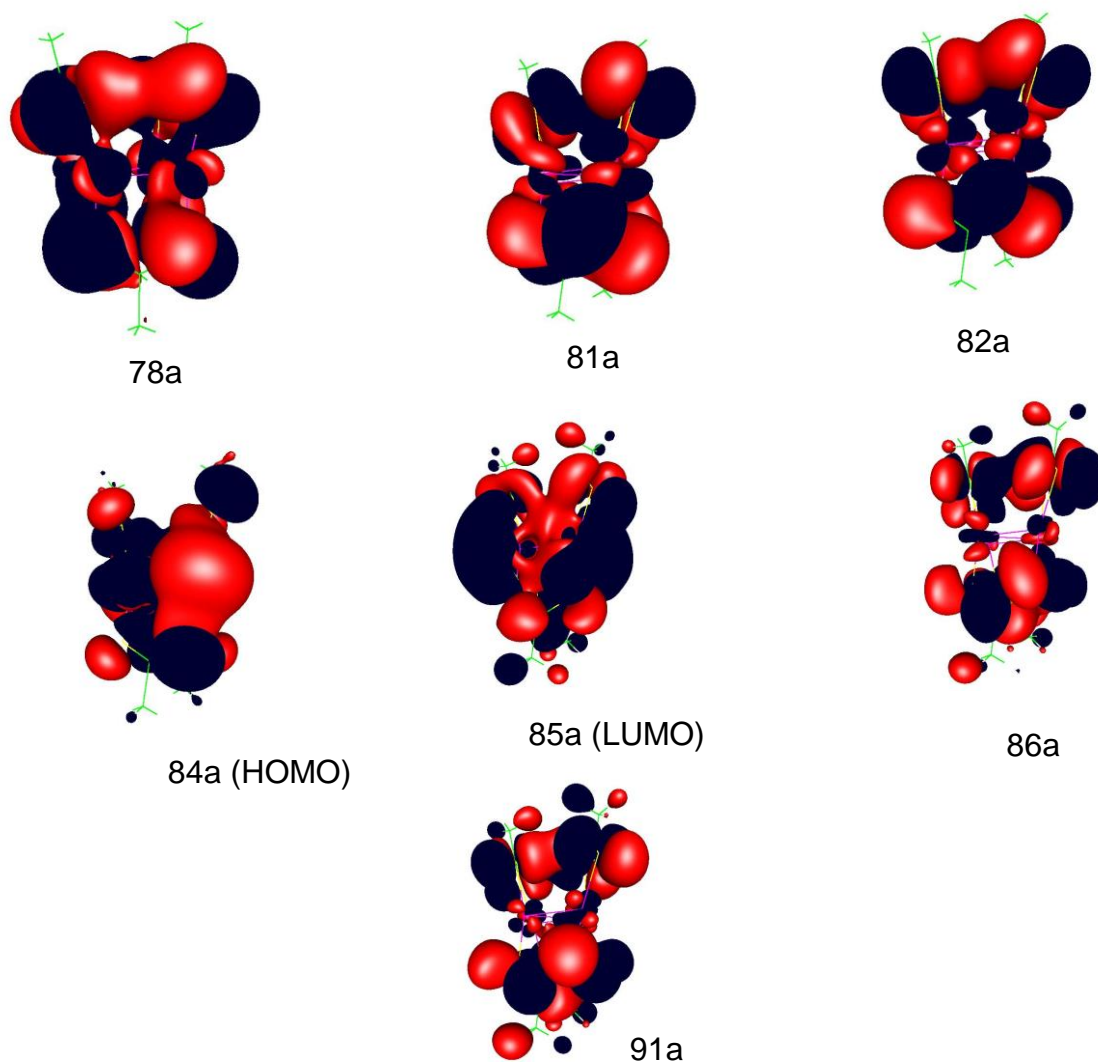

**F5.** Most important active molecular orbitals in the electronic transitions of  $[\text{Au}(\text{S}_2\text{CCH}_3)_4]$  in the  $\text{CS}_2$  phase at the PBE level.

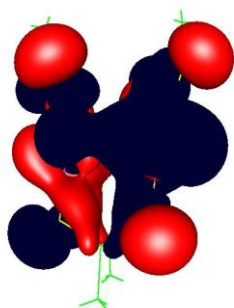

79a

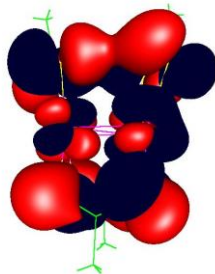

82a

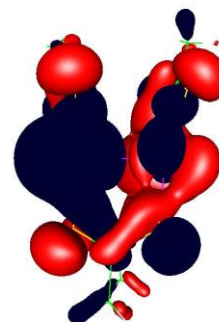

83a (HOMO-1)

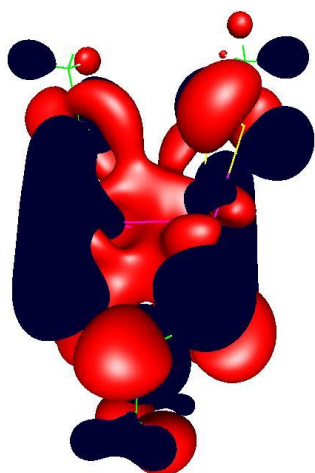

85a (LUMO)

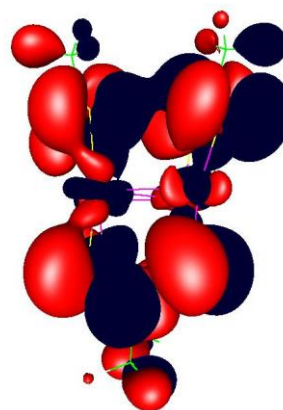

87a

**F6.** Most important active molecular orbitals in the electronic transitions of  $[\text{Au}(\text{S}_2\text{CCH}_3)_4]$  in the  $\text{CS}_2$  phase at the TPSS level.

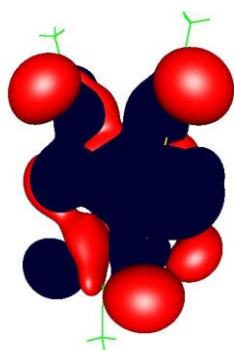

79a

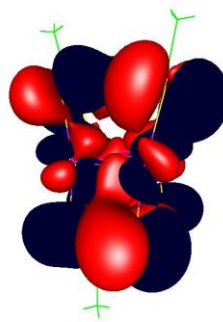

80a

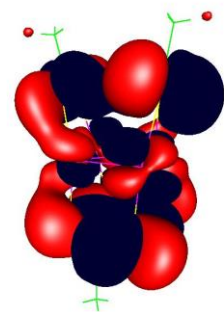

81a

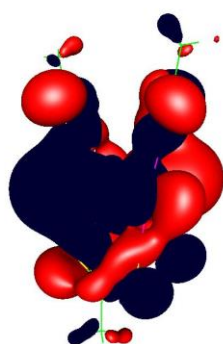

83a (HOMO-1)

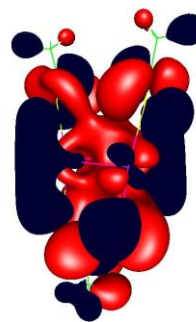

85a (LUMO)

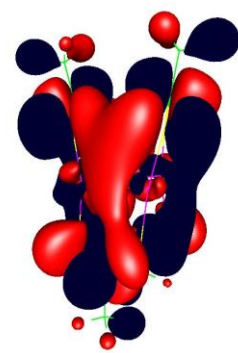

86a

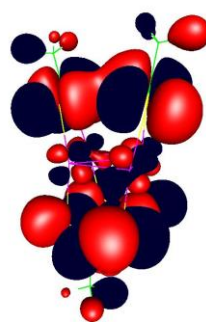

88a
